# Supplementary material for: Probability-based surveying using self-sampling to estimate catch and effort in Norway's coastal tourist fishery
Source: Oxford University Press journal article supplement (doi:10.1093/icesjms/fsr077), 2011-06-08

**Supplementary material: ICES Journal of Marine Science, 68**

**Probability-based surveying using self-sampling to estimate catch and effort in Norway’s coastal tourist fishery**

J. H. Vølstad, K. Korsbrekke, K. H. Nedreaas, M. Nilsen, G. N. Nilsson,

M. Pennington, S. Subbey, and R. Wienerroither

**Table S1**. Other species registered in catch diaries by region (north, N, and south, S, of 62°N).

| **Family** | **Species** | **English name** | **Norwegian name** | **N** | **S** |
| --- | --- | --- | --- | --- | --- |
| Squalidae | *Squalus acanthias* Linneaus, 1758 | Picked dogfish | Pigghå | x | x |
| Clupeidae | *Clupea harengus* Linnaeus, 1758 | Atlantic herring | Sild | x | x |
| Gadidae | *Merlangius merlangus* (Linnaeus, 1758) | Whiting | Hvitting | x | x |
| Gadidae | *Micromesistius poutassou* (Risso, 1827) | Blue whiting | Kolmule |  | x |
| Gadidae | *Trisopterus luscus* (Linnaeus, 1758) | Pouting | Skjeggtorsk |  | x |
| Lotidae | *Molva dypterygia* (Pennant, 1784) | Blue ling | Blålange | x | x |
| Merlucciidae | *Merluccius merluccius* (Linnaeus, 1758) | European hake | Lysing | x | x |
| Lophiidae | *Lophius piscatorius* Linnaeus, 1758 | Angler | Breiflabb | x | x |
| Belonidae | *Belone belone* (Linnaeus, 1761) | Garfish | Horngjel | x | x |
| Sebastidae. |  | Rockfish | Uerfamilien | x | x |
| Triglidae | *Eutrigla gurnardus* (Linnaeus, 1758) | Grey gurnard | Knurr | x | x |
| Cyclopteridae | *Cyclopterus lumpus* Linnaeus, 1758 | Lumpfish | Rognkjeks |  | x |
| Labridae |  | Wrasses | Leppefiskfamilien | x | x |
| Anarhichadidae | *Anarhichas* spp. | Wolffish | Steinbitfamilien | x |  |
| Ammodytidae |  | Sand lance | Silfamilien |  | x |
| Scophthalmidae | Lepidorhombus whiffiagonis (Walbaum, 1792) | Megrim | Glassvar |  | x |
| Scophthalmidae | *Psetta maxima* (Linnaeus, 1758) | Turbot | Piggvar |  | x |
| Scophthalmidae | *Scophthalmus rhombus* (Linnaeus, 1758) | Brill | Slettvar |  | x |
| Pleuronectidae | *Limanda limanda* (Linnaeus, 1758) | Common dab | Sandflyndre | x | x |
| Pleuronectidae | *Pleuronectes platessa* Linnaeus, 1758 | European plaice | Rødspette | x | x |
| Pleuronectidae |  | Righteye flounders | Flyndrefamilien |  | x |
| Soleidae |  | Soles | Tungefamilien |  | x |

**Table S2**. Species identification by fishers after 33 fishing trips during summer 2009.

| **Species (English, Latin - Norwegian)** | | **Correctly identified to species (%)** | **Correctly identified to genus (%)** | **Incorrectly identified** | **Not identified** |
| --- | --- | --- | --- | --- | --- |
| Cod | *Gadus morhua* - Torsk | 100 |  |  |  |
| Saithe | *Pollachius virens* - Sei | 100 |  |  |  |
| Mackerel | *Scomber scombrus* - Makrell | 100 |  |  |  |
| Ling | *Molva molva* - Lange | 100 |  |  |  |
| Tusk | *Brosme brosme* - Brosme | 96.7 |  |  | 3.3 |
| Pollack | *Pollachius pollachius* - Lyr | 90.0 |  | 10.0 |  |
| Halibut | *Hippoglossus hippoglossus* - Kveite | 80.0 |  | 13.3 | 6.7 |
| Haddock | *Melanogrammus aeglefinus* - Hyse | 66.7 |  | 26.7 | 6.7 |
| European hake | *Merluccius merluccius -* Lysing | 66.7 |  | 16.7 | 16.7 |
| European plaice | *Pleuronectes platessa* - Rødspette | 53.3 |  | 30.0 | 16.7 |
| Whiting | *Merlangius merlangus* - Hvitting | 46.7 |  | 30.0 | 23.3 |
| Spotted wolffish | *Anarhichas minor* - Flekksteinbit | 33.3 | 46.7 | 3.3 | 16.7 |
| Atlantic wolffish | *Anarhichas lupus* - Gråsteinbit | 30.0 | 60.0 | 3.3 | 6.7 |
| Common dab | *Limanda limanda* - Sandflyndre | 26.7 |  | 43.3 | 30.0 |
| European flounder | *Platichthys flesus* - Skrubbe | 20.0 |  | 46.7 | 33.3 |
| Blue ling | *Molva dypterygia* - Blålange | 13.3 |  | 16.7 | 70.0 |
| Northern wolffish | *Anarhichas denticulatus* - Blåsteinbit | 3.3 | 33.3 |  | 63.3 |

**Figure S1**. Catch diary used for recording daily effort and catch in numbers and weight (kg)


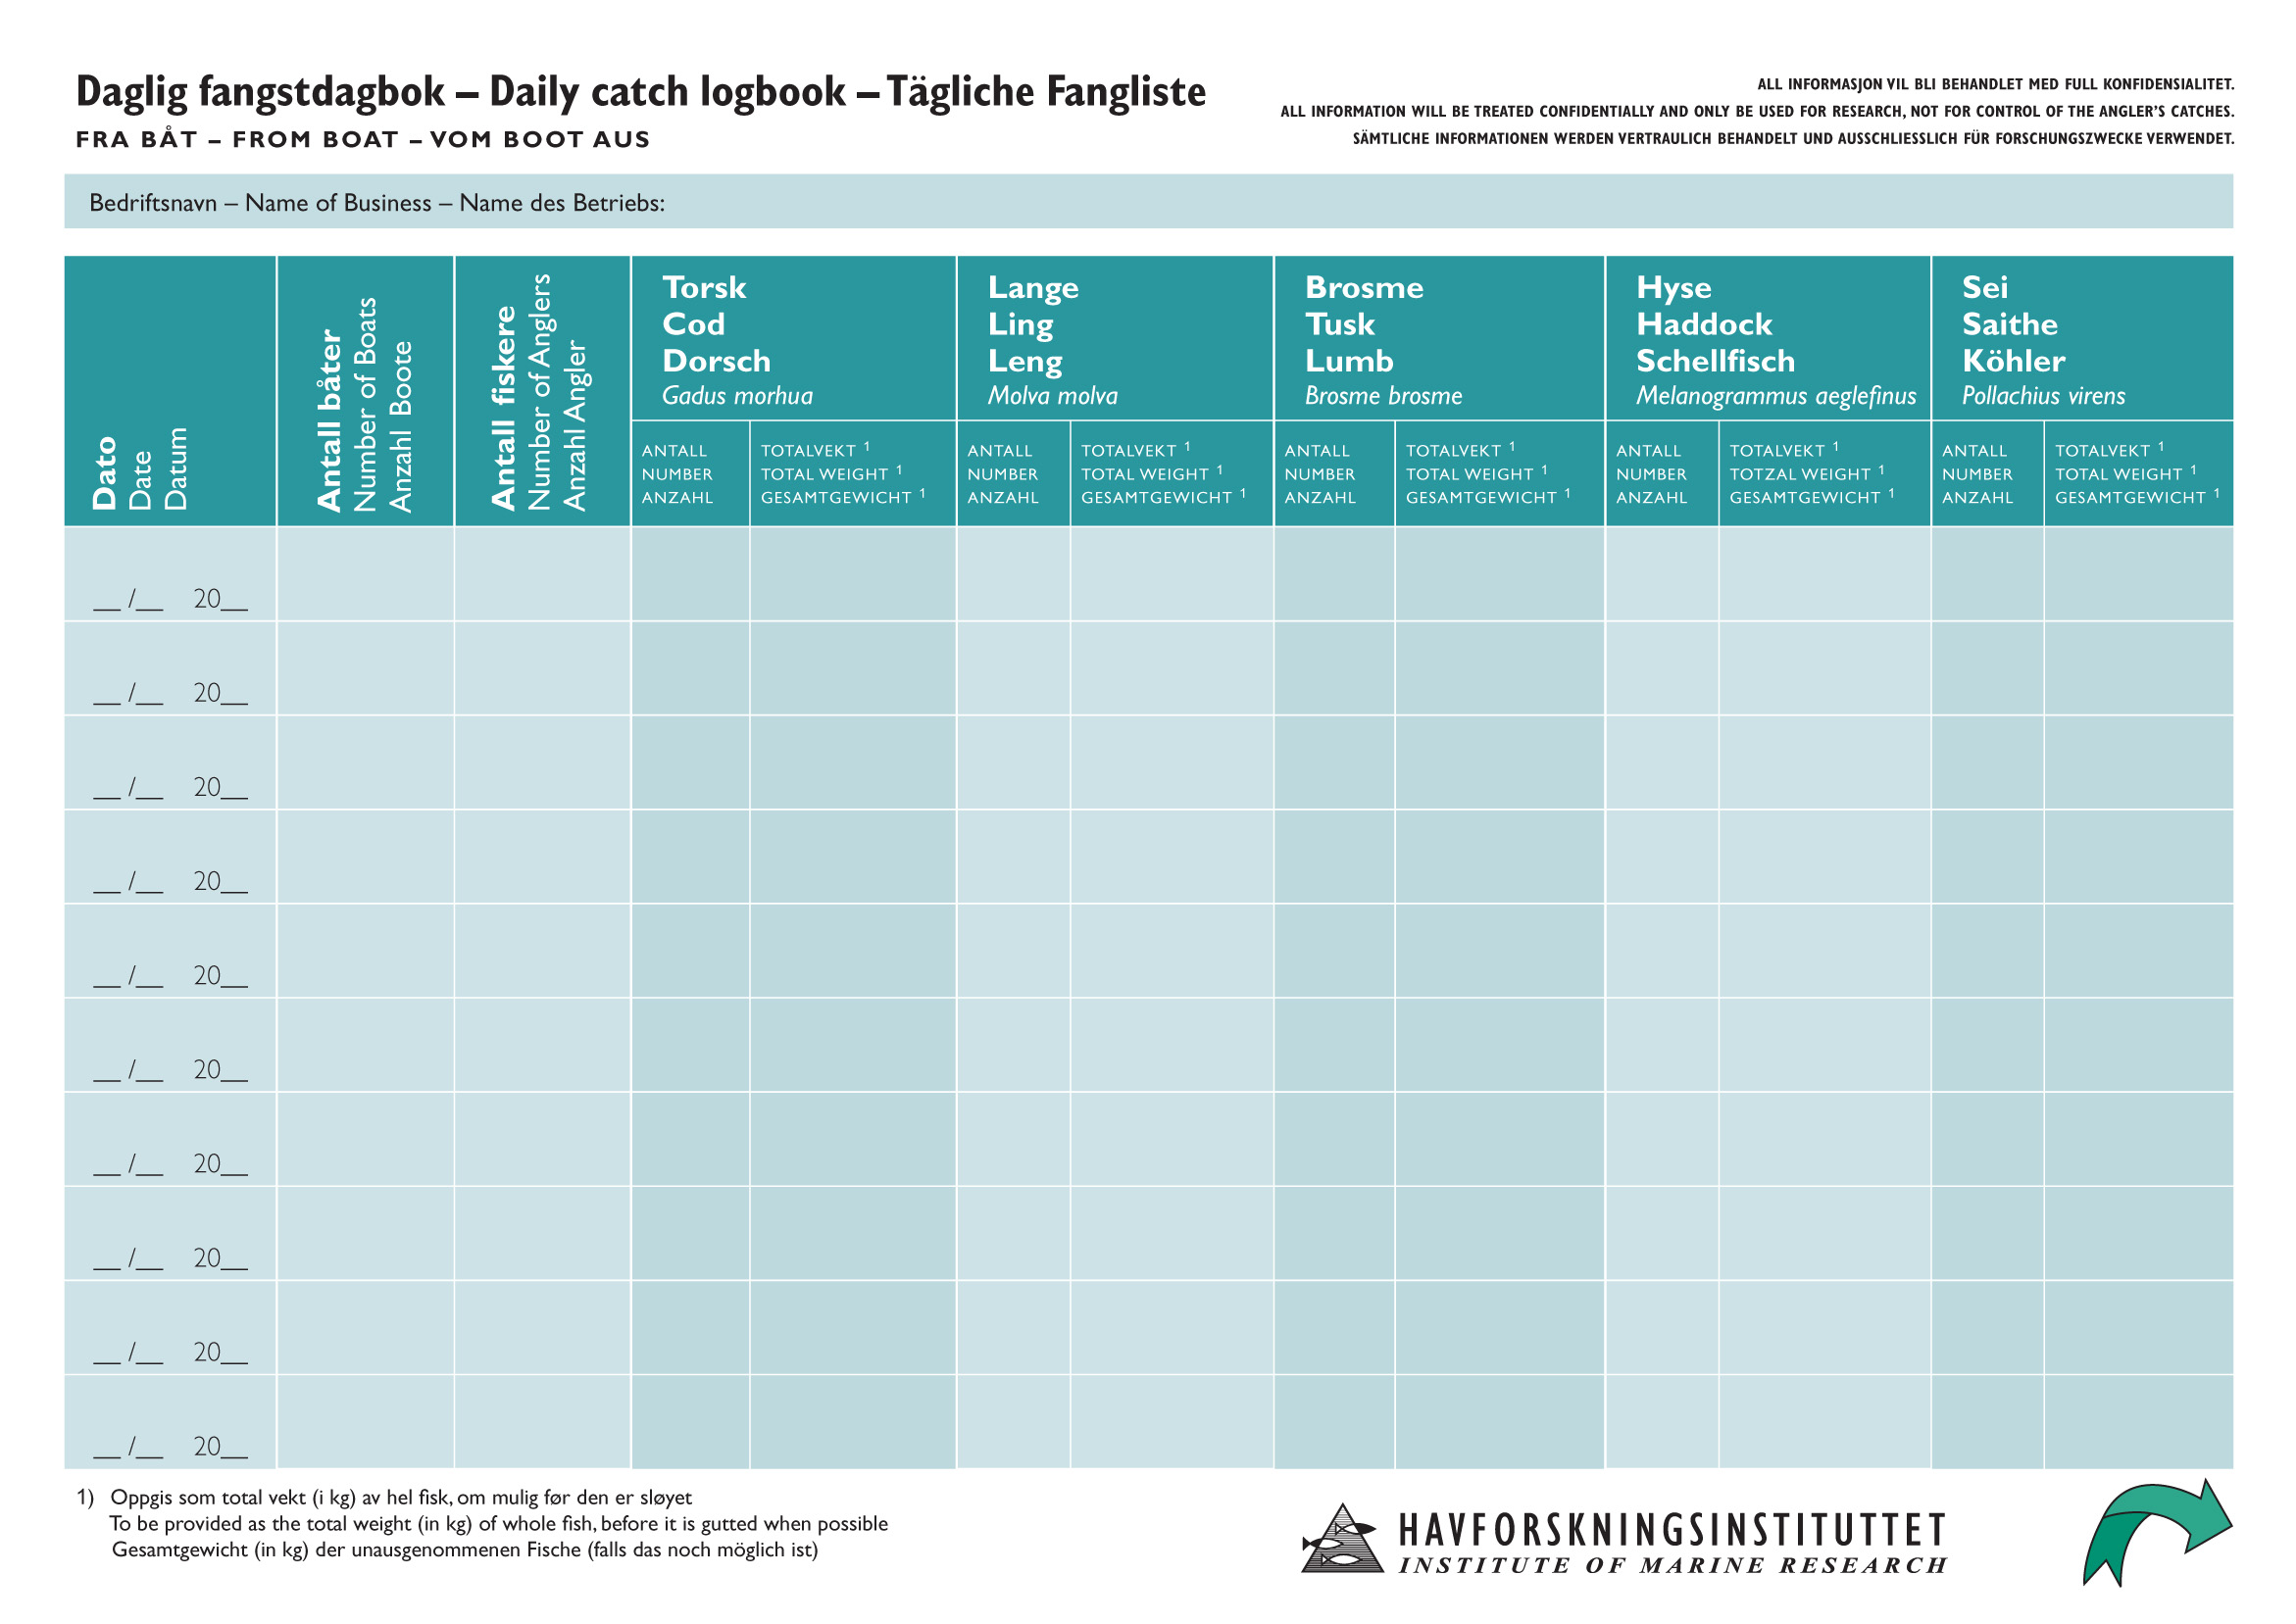


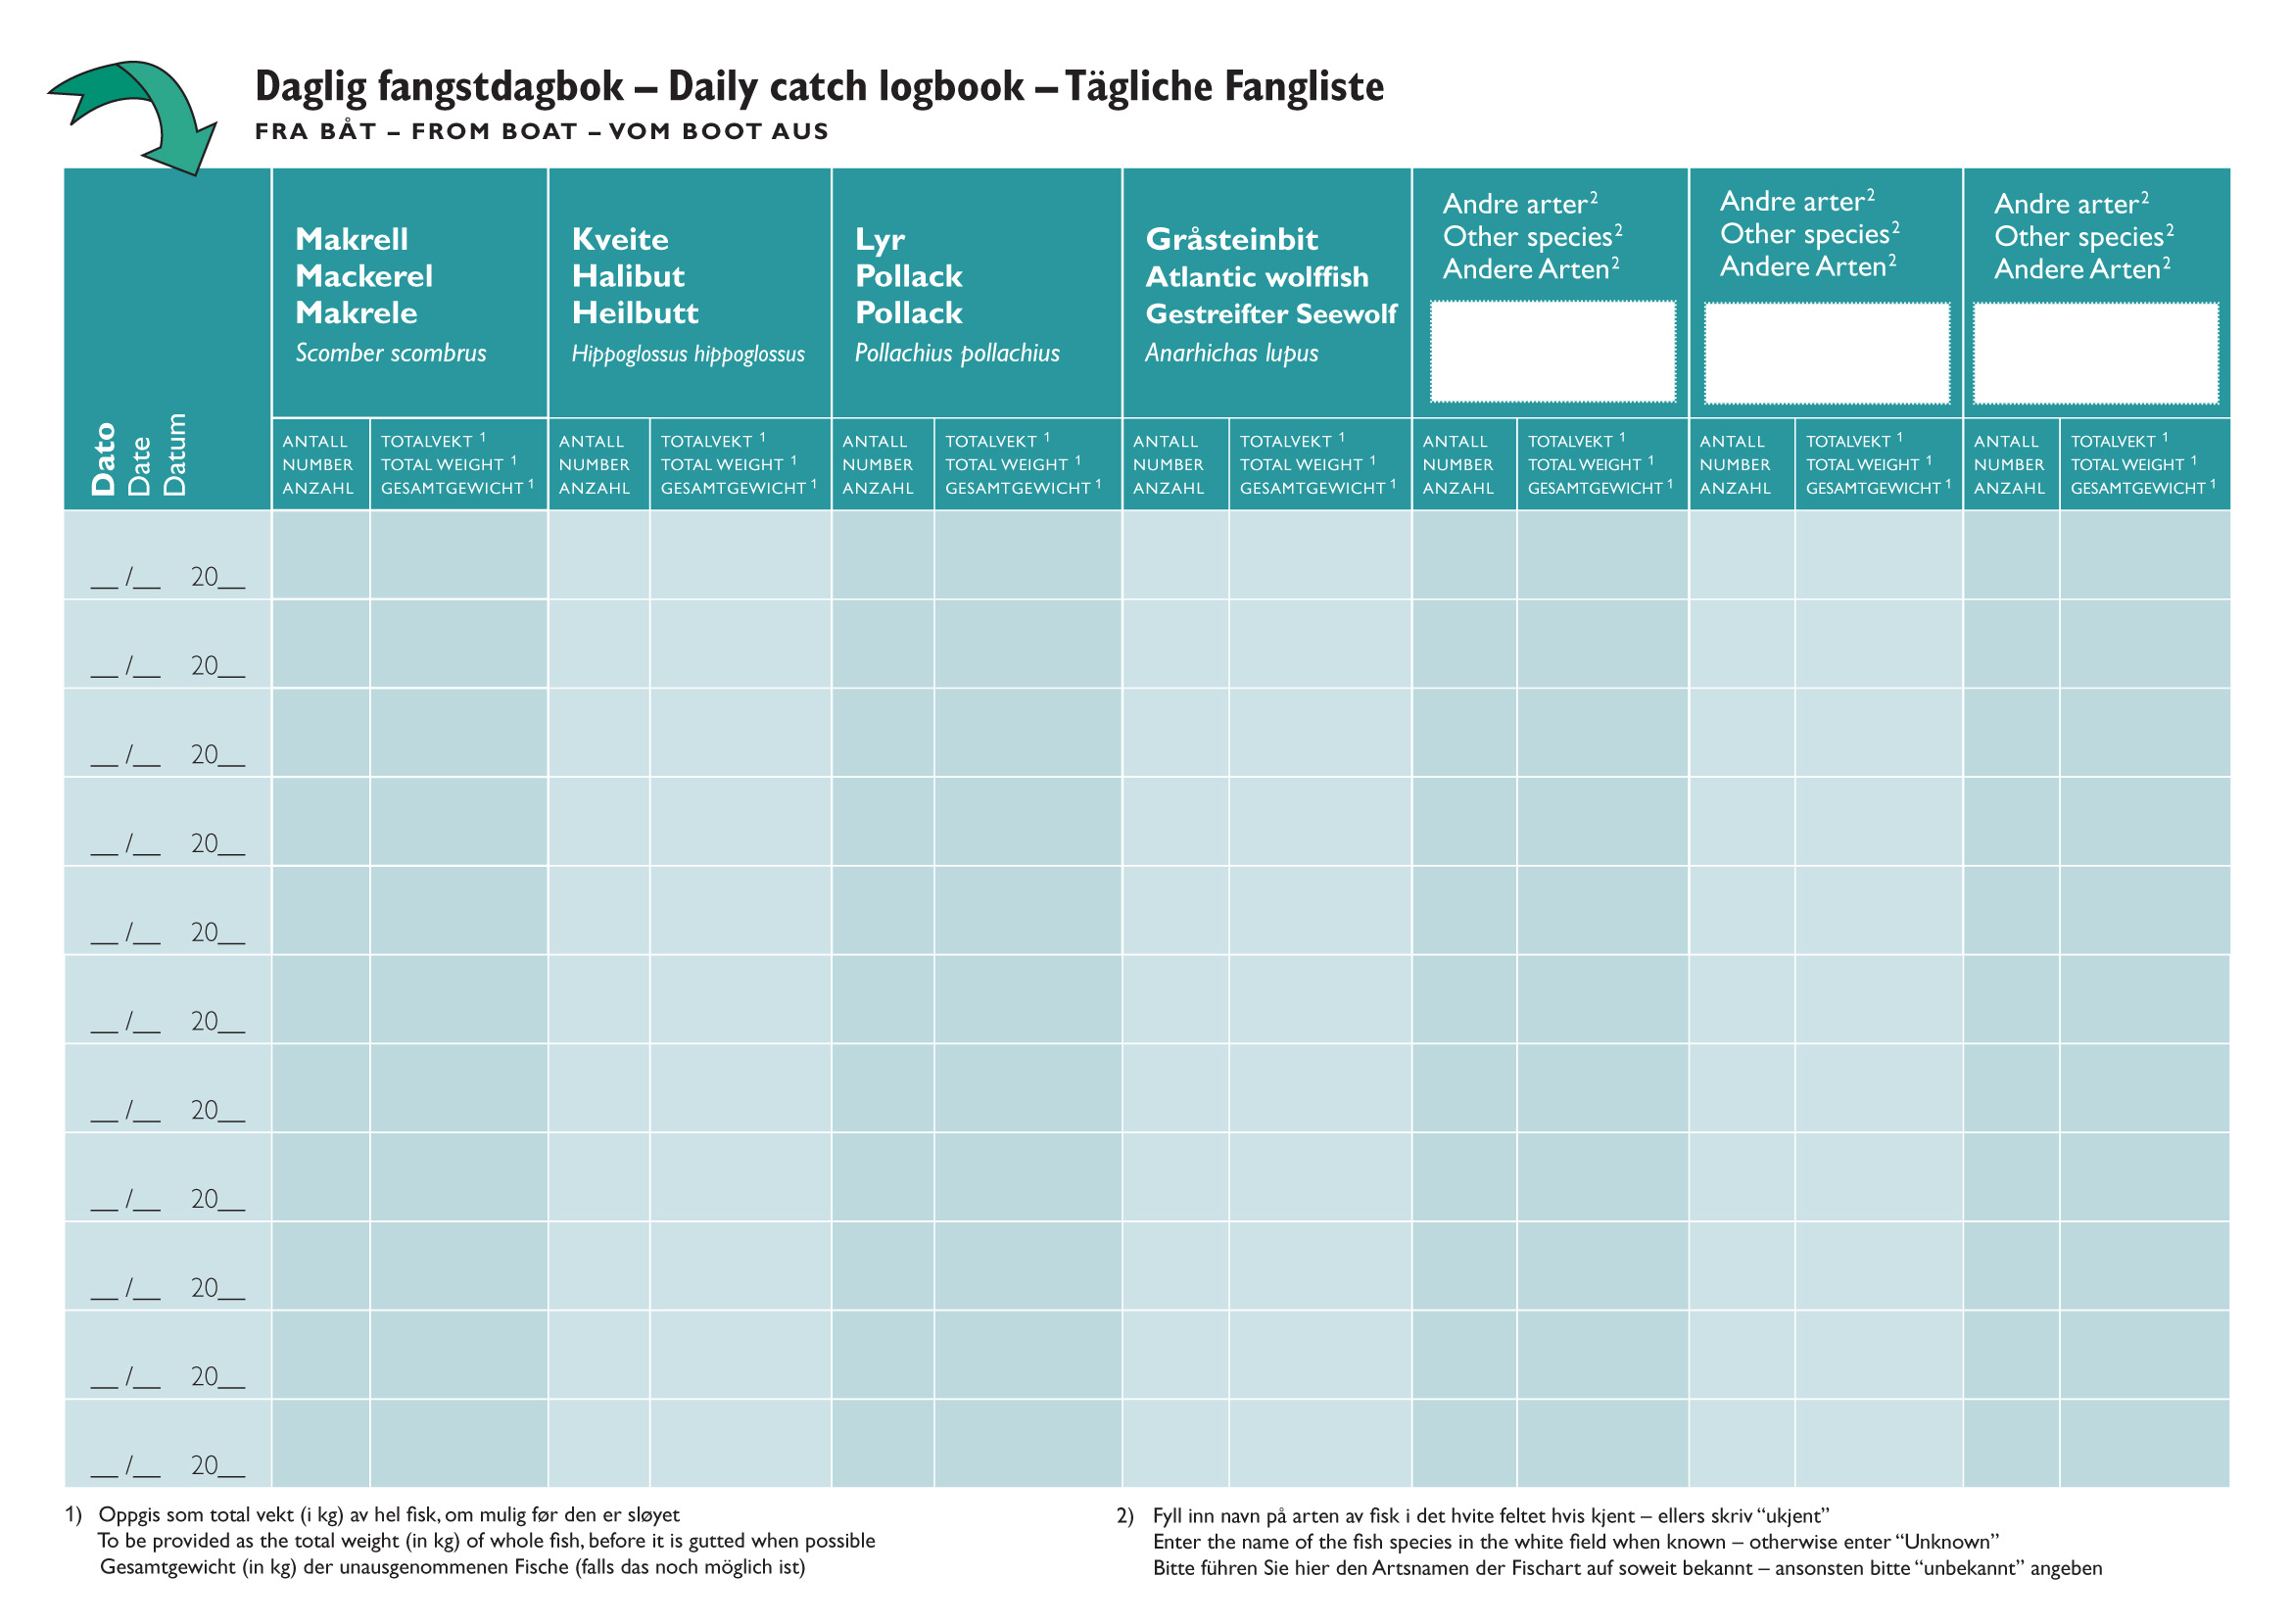


**Figure S2**. Catch diary used for recording daily effort and catch in numbers


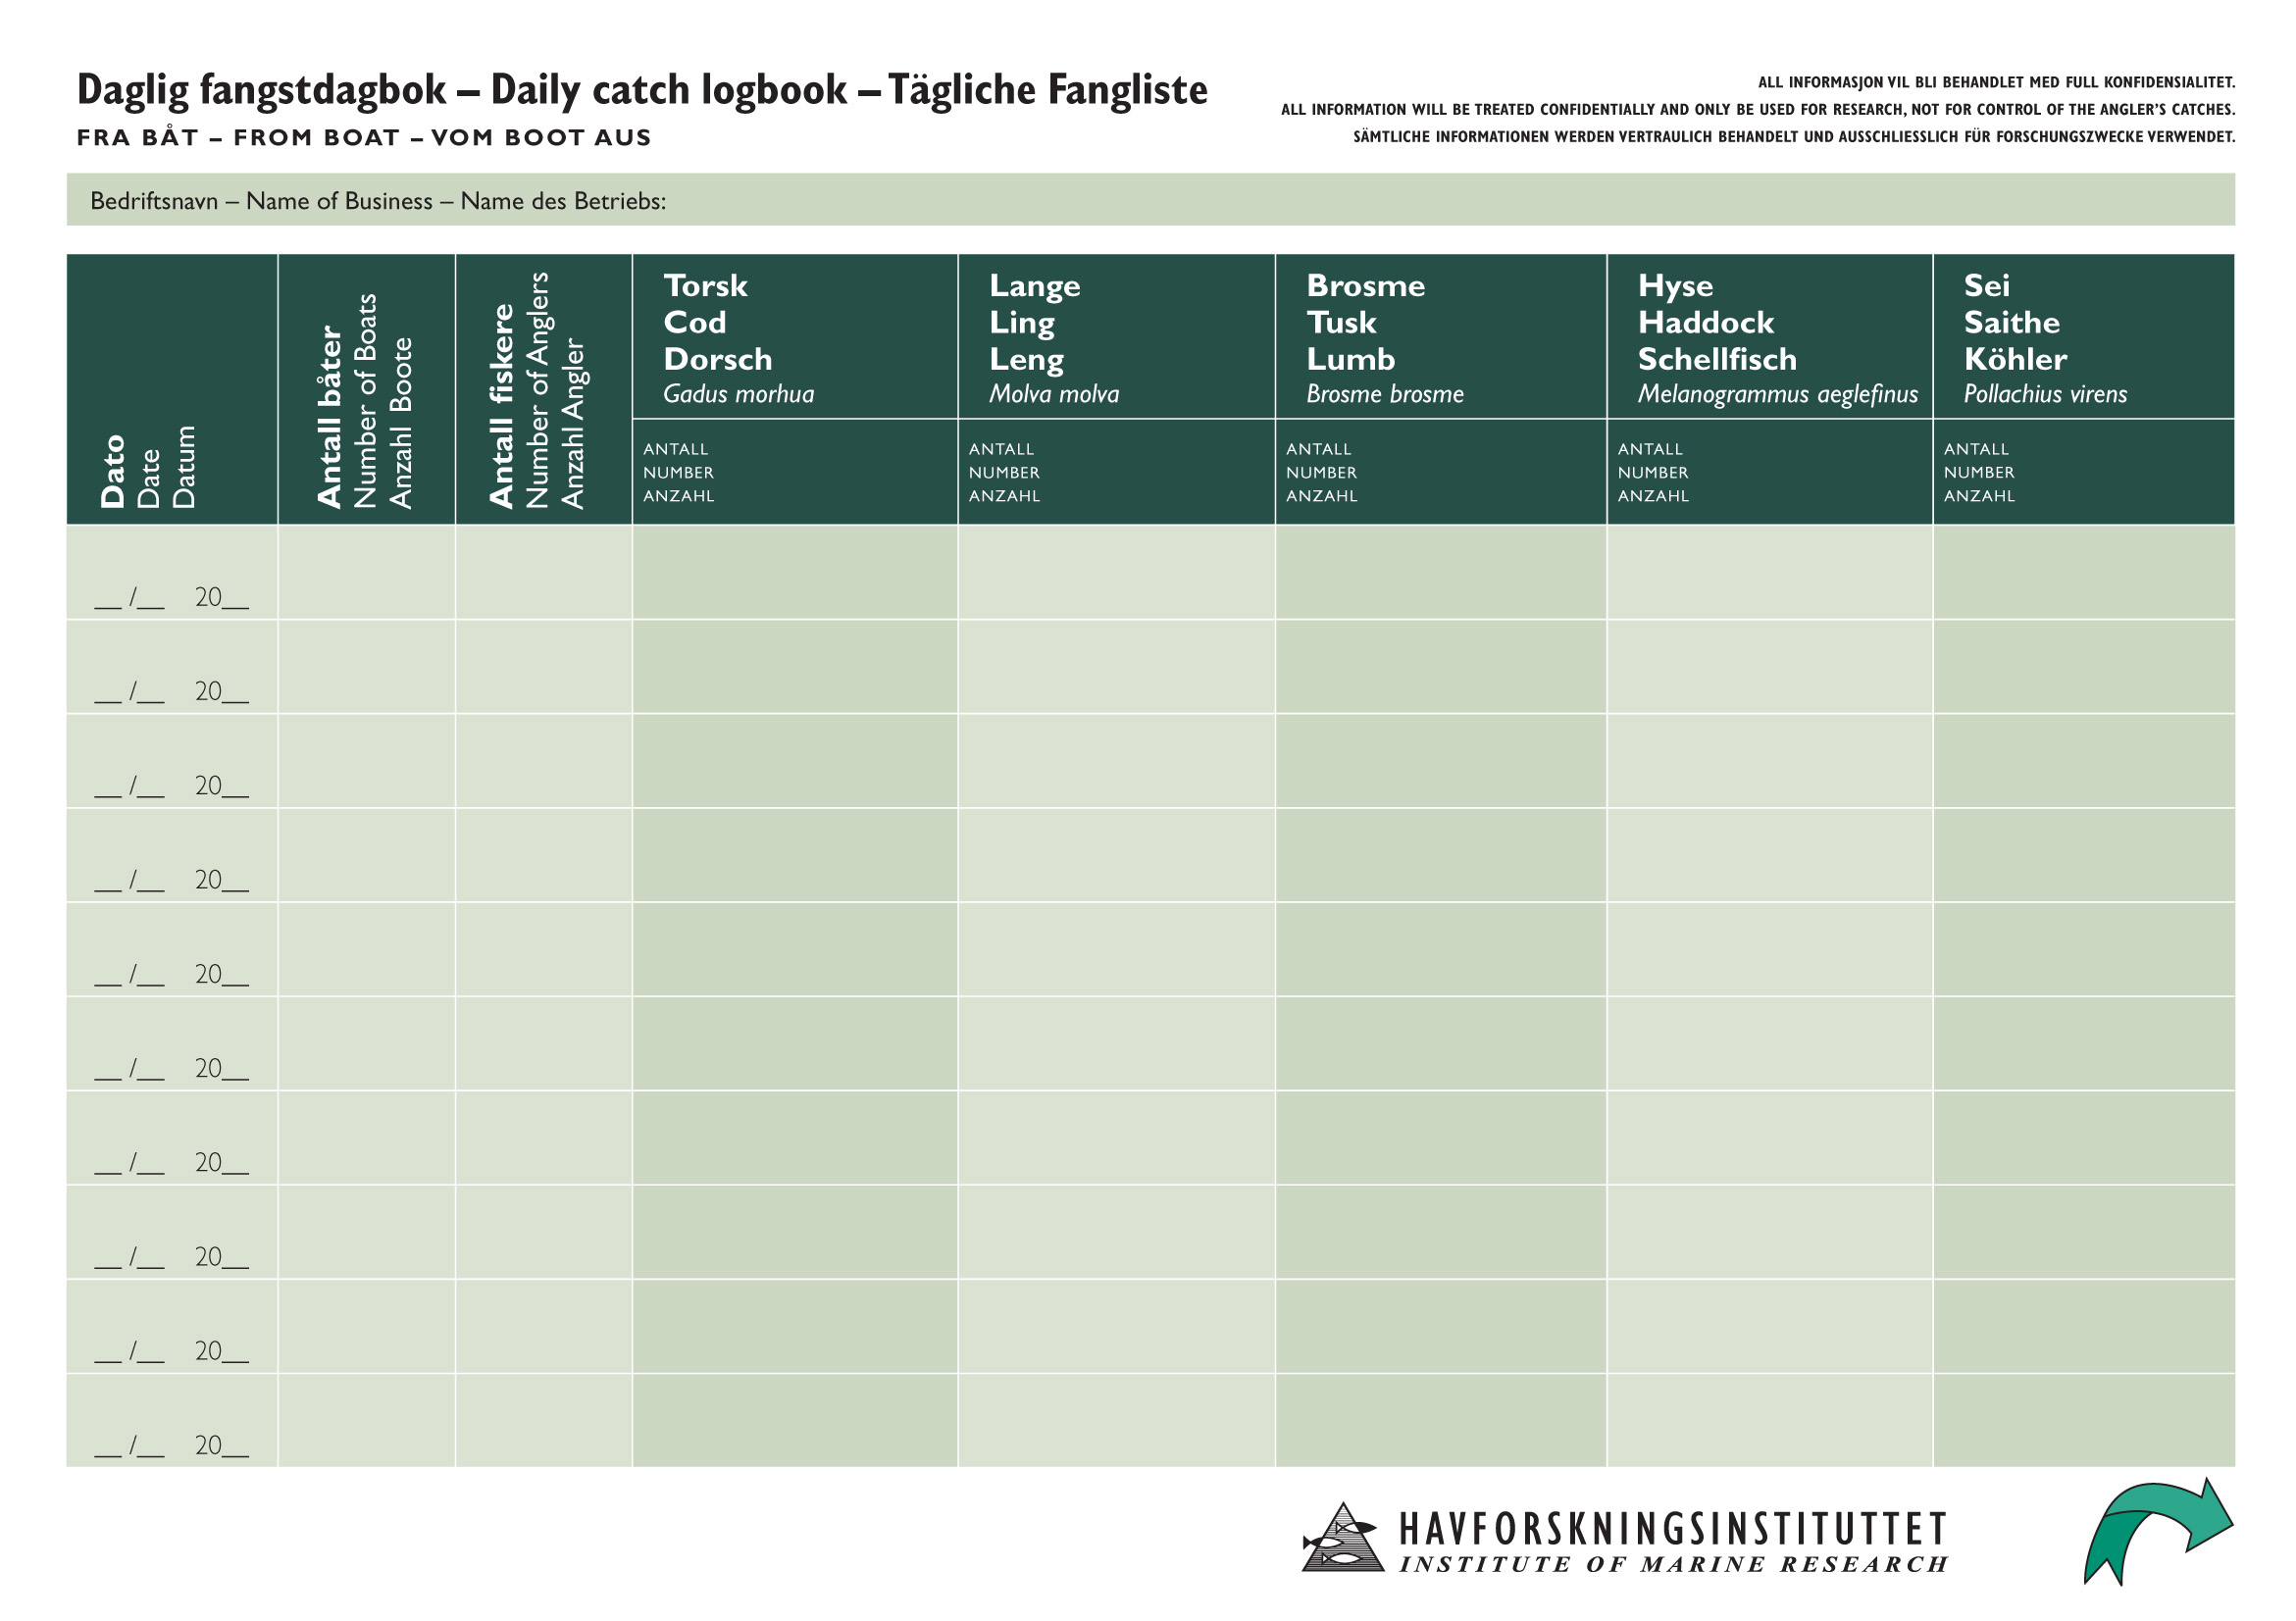


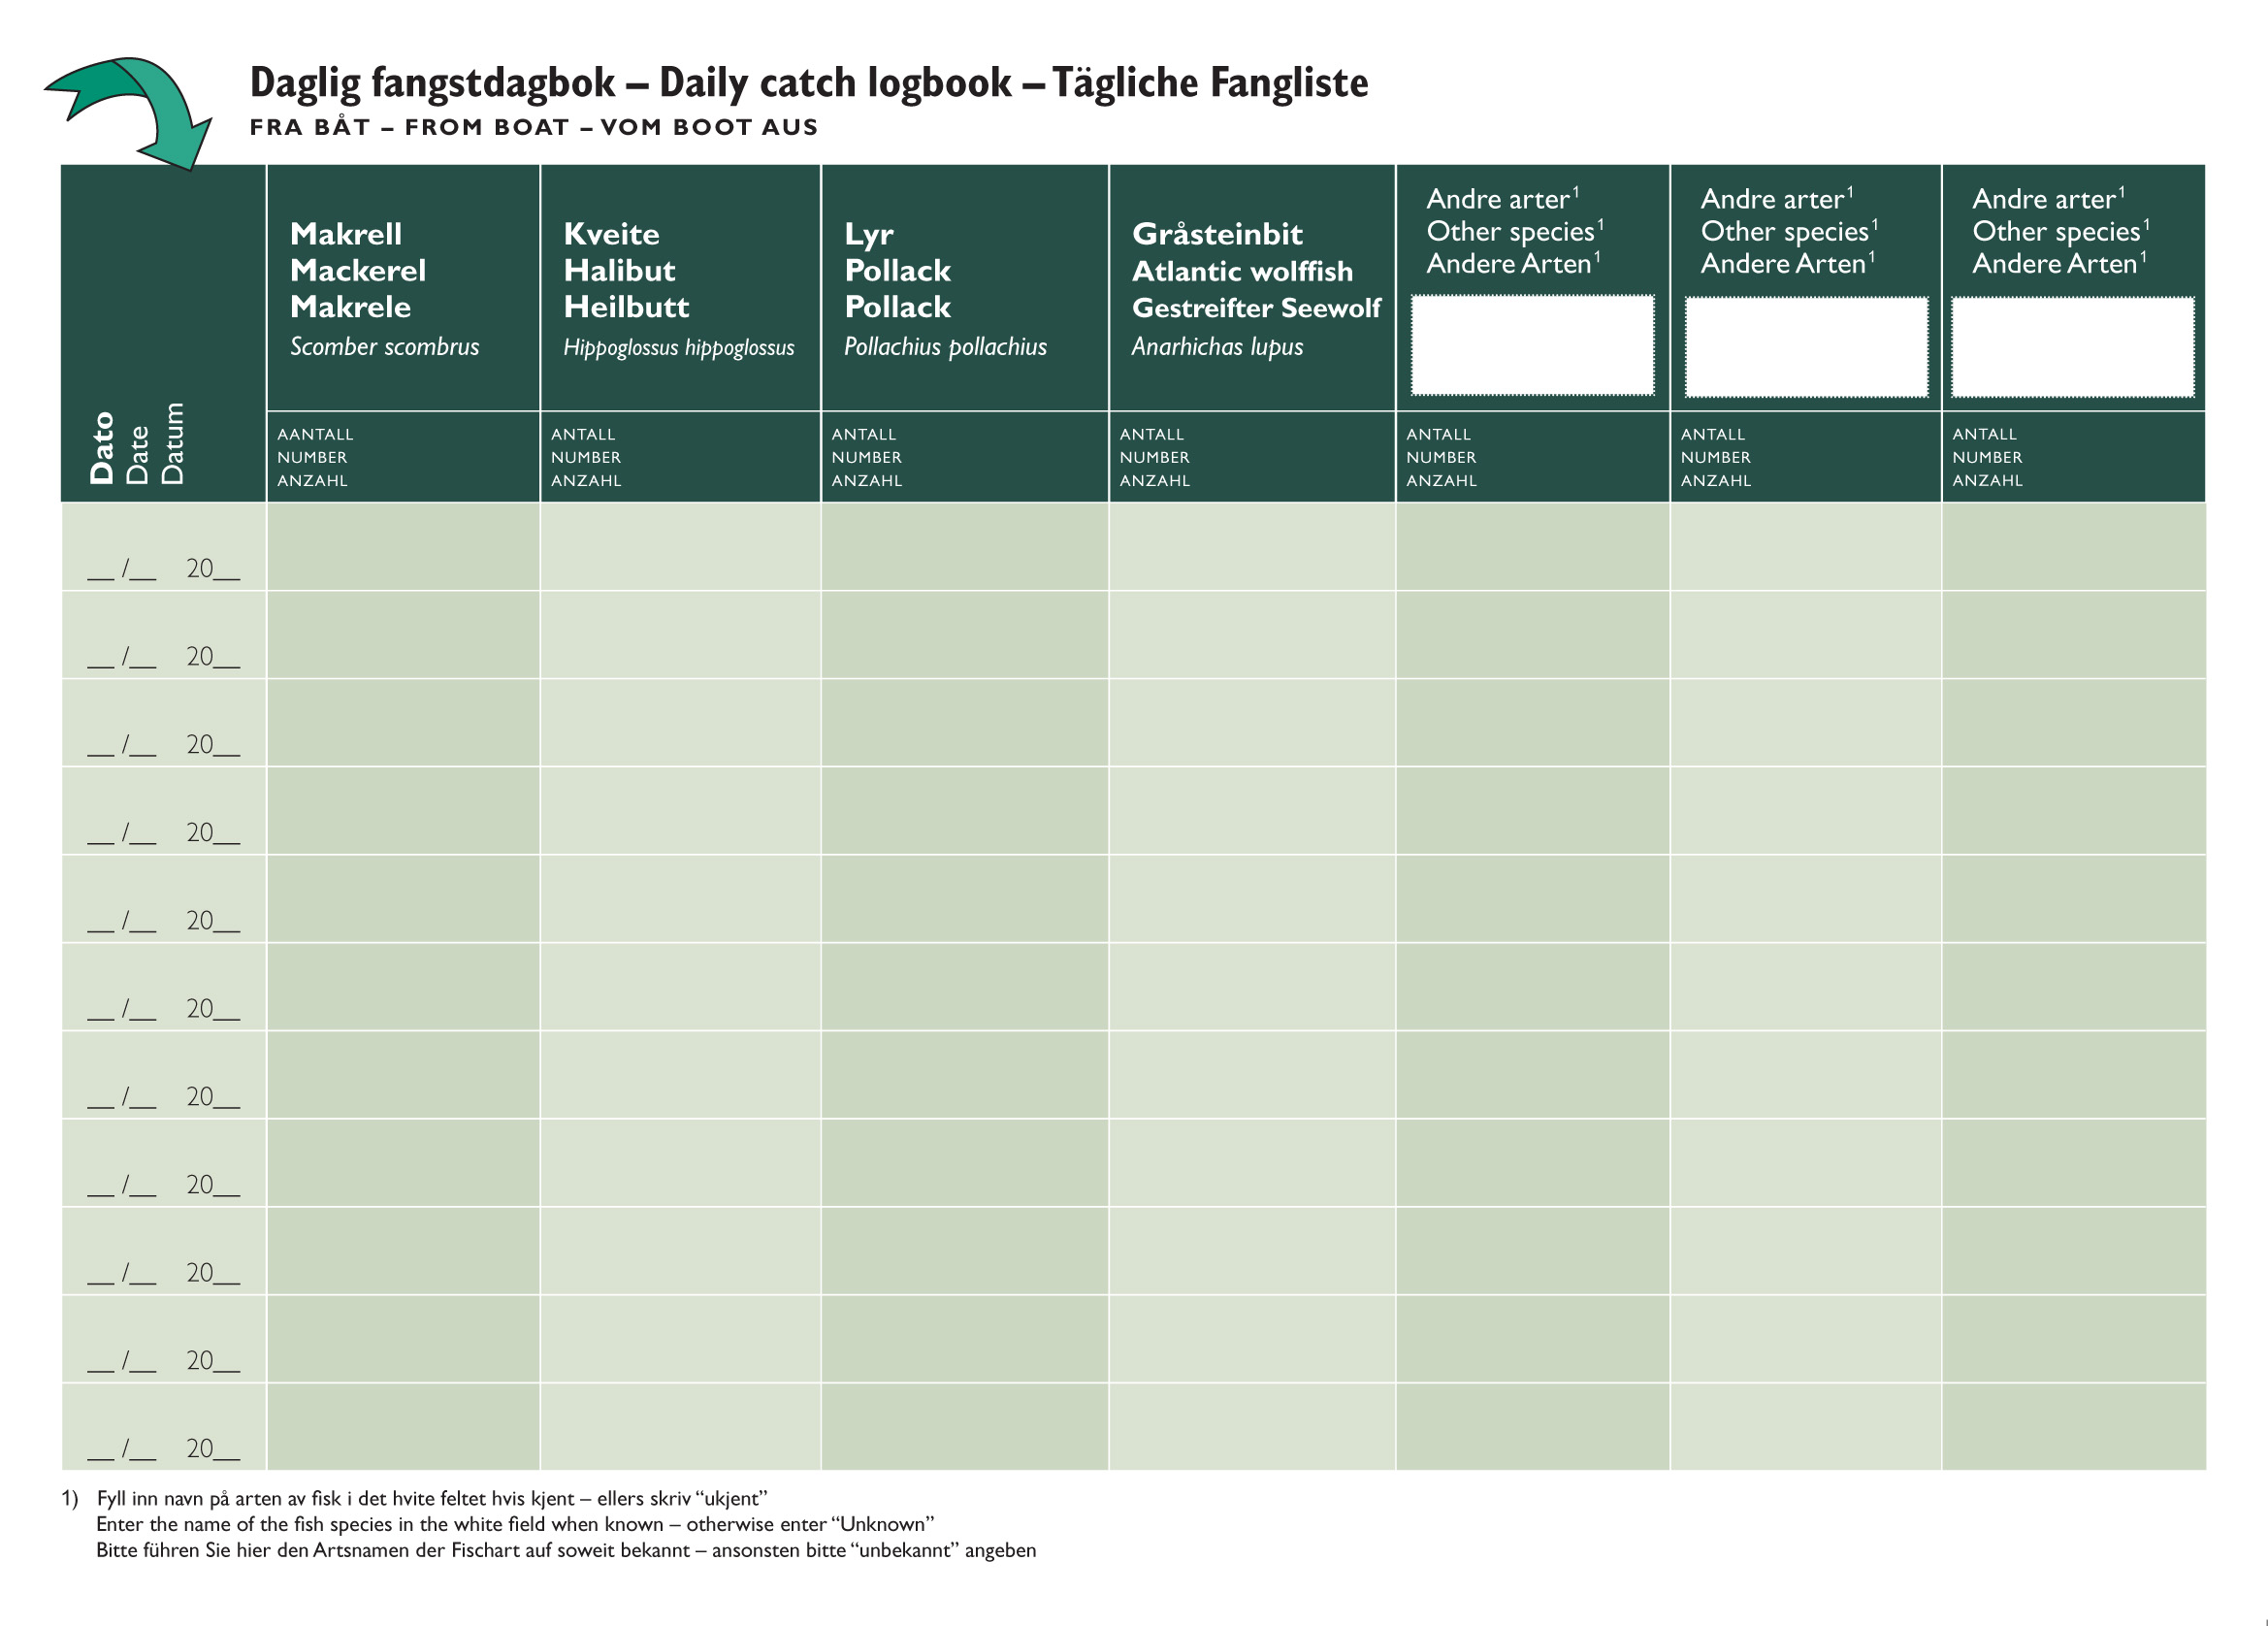

Supplement: fsr077supp.doc [file fsr077supp.doc]
